# Supplementary material for: Antitumor Effects of Freeze‐Dried Robusta Coffee (Coffea canephora) Extracts on Breast Cancer Cell Lines
Source: Hindawi journal article supplement (doi:10.1155/2021/5572630), 2021-01-01

**A**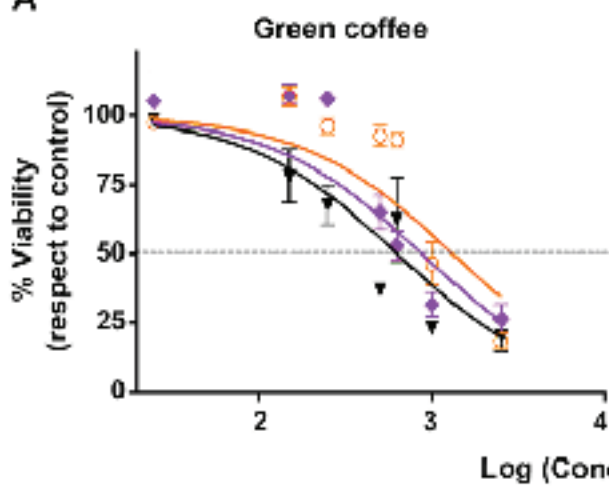**B**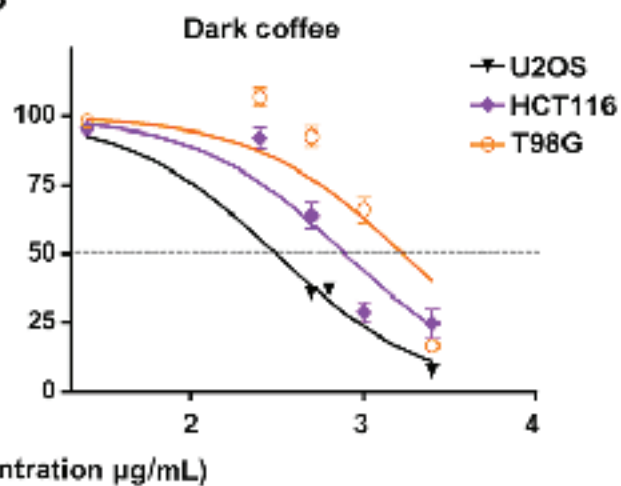**C**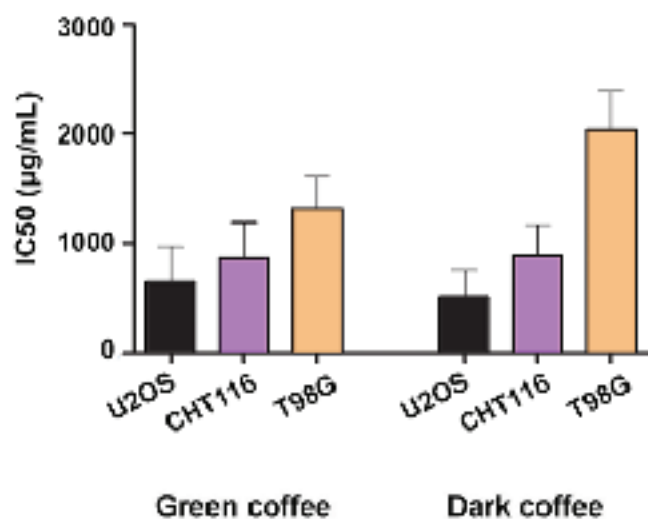**D**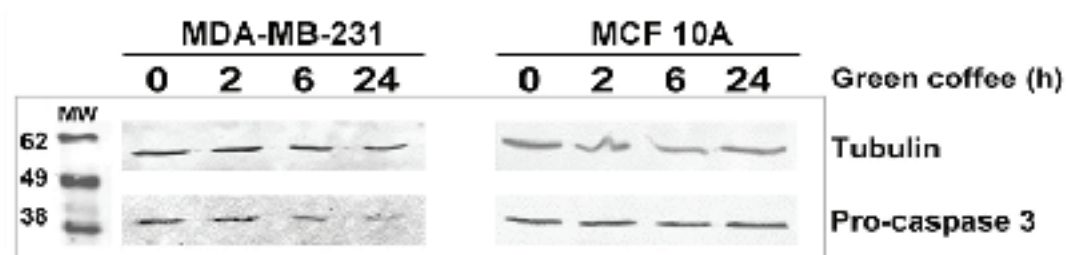**E**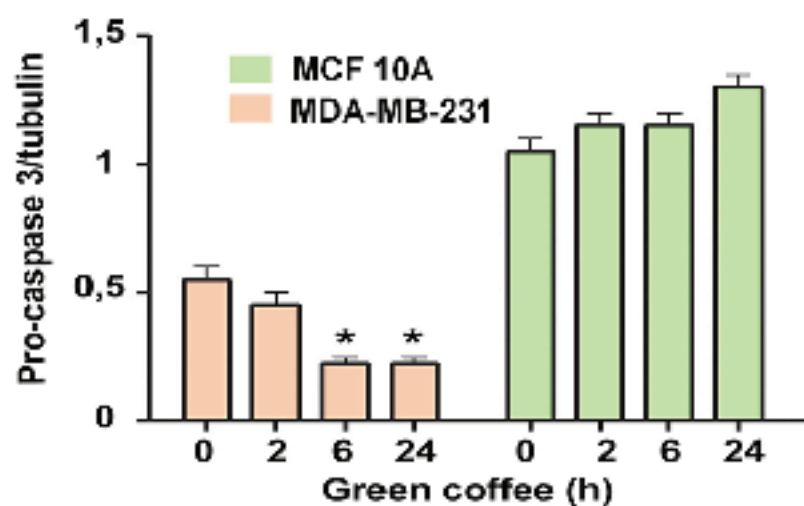

Supplement: f1 [file 5572630.f1.pdf]
